# Supplementary material for: Proteomic Analysis of Synovial Fibroblasts and Articular Chondrocytes Co-Cultures Reveals Valuable VIP-Modulated Inflammatory and Degradative Proteins in Osteoarthritis
Source: MDPI journal article supplement (doi:10.3390/ijms22126441), 2021-06-16
Supplement: s1 [file s1]

# Proteomic Analysis of Synovial Fibroblasts and Articular Chondrocytes Co-Cultures Reveals Valuable VIP-Modulated Inflammatory and Degradative Proteins in Osteoarthritis

Selene Pérez-García <sup>1</sup>, Valentina Calamia <sup>2</sup>, Tamara Hermida-Gómez <sup>2</sup>, Irene Gutiérrez-Cañas <sup>1</sup>, Mar Carrión <sup>1</sup>, Raúl Villanueva-Romero <sup>1</sup>, David Castro <sup>1</sup>, Carmen Martínez <sup>1</sup>, Yasmina Juarranz <sup>1</sup>, Francisco J. Blanco <sup>2</sup> and Rosa P. Gomariz <sup>1,\*</sup>

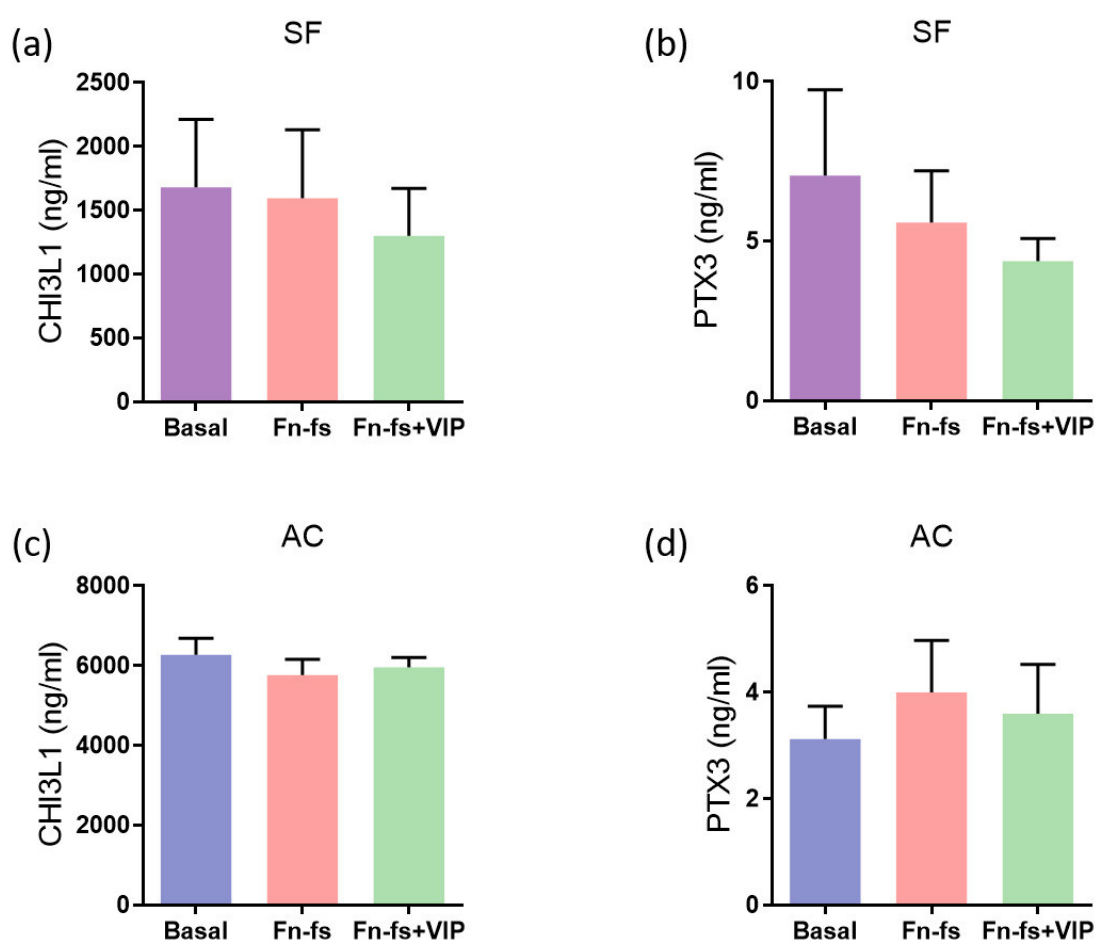

**Figure S1.** VIP-modulated inflammatory proteins. Protein secretion of (a),(c) CHI3L1 and (b),(d) PTX3 were determined by ELISA and Multiplex, respectively, in (a),(b) SF and (c),(d) AC cultures secretomes at 48 hours of treatment with and without 10 nM 45 kDa Fn-fs in the presence and absence of 10 nM VIP (n = 5). Data are presented as mean  $\pm$  SEM of duplicate determinations.

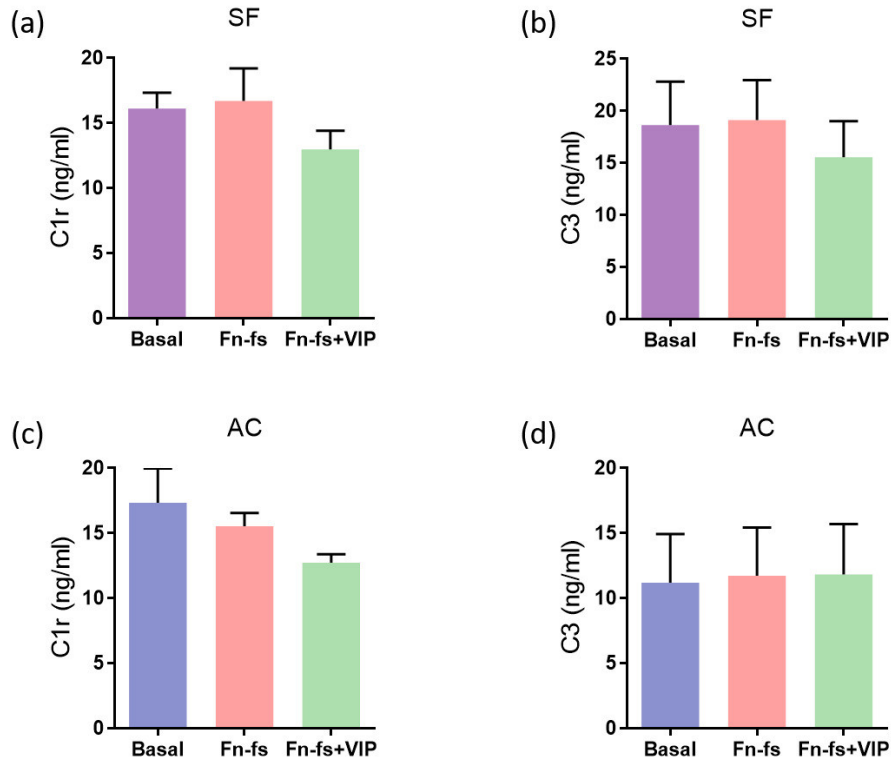

**Figure S2.** VIP-modulated complement pathway proteins. Protein secretion of (a),(c) C1R and (b),(d) C3 were determined by ELISA and Multiplex, respectively, in (a),(b) SF and (c),(d) AC cultures secretomes at 48 hours of treatment with and without 10 nM 45 kDa Fn-fs in the presence and absence of 10 nM VIP (n = 5). Data are presented as mean  $\pm$  SEM of duplicate determinations.

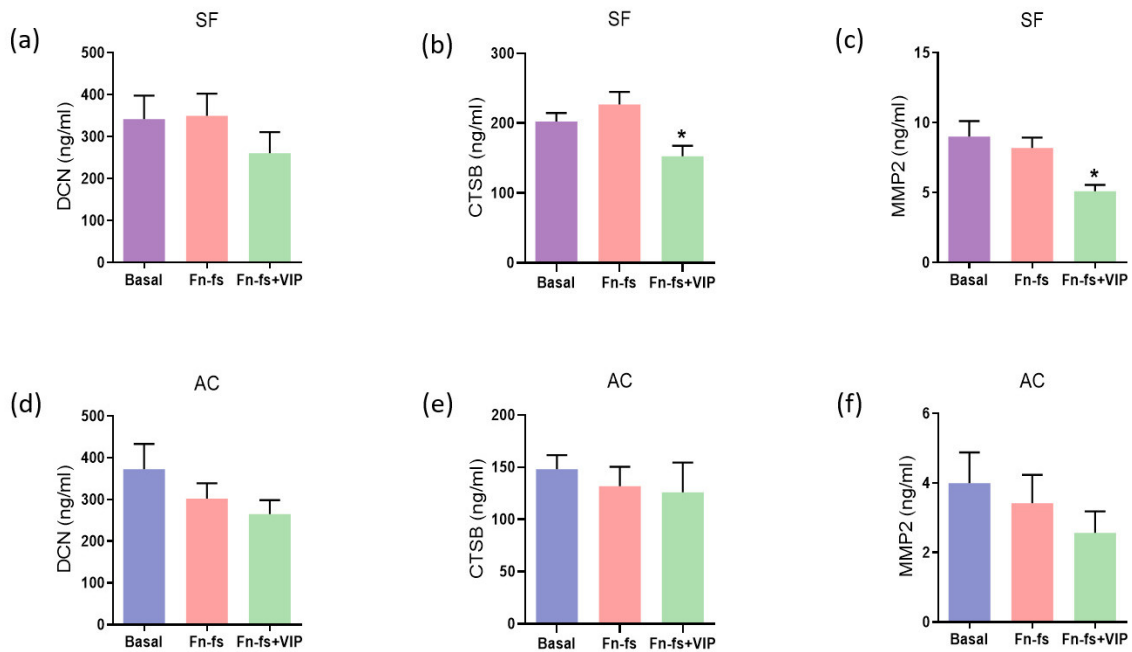

**Figure S3.** VIP-modulated ECM degradation proteins. Protein secretion of (a),(d) DCN, (b),(e) CTSSB, and (c),(f) MMP2 were determined by ELISA and Multiplex, respectively, in (a),(b),(c) SF and (d),(e),(f) AC cultures secretomes at 48 hours of treatment with and without 10 nM 45 kDa Fn-fs in the presence and absence of 10 nM VIP (n = 5). Data are presented as mean  $\pm$  SEM of duplicate determinations. \* $p < 0.05$  Fn-fs+VIP vs Fn-fs.

**Table S1.** Proteins identified by SILAC analysis in the Fn-fs-stimulated secretome of OA SF-AC co-cultures with or without VIP treatment.

**Forward**

| Acc No <sup>a</sup> | Protein Symbol | Protein Name                                               | Peptides<br>(95%) <sup>b</sup> | Ratio <sup>c</sup> | PVal <sup>d</sup> | EF <sup>e</sup> |
|---------------------|----------------|------------------------------------------------------------|--------------------------------|--------------------|-------------------|-----------------|
| P63261              | ACTG           | Actin, cytoplasmic 2                                       | 10                             | 1.217              | 0.472             | 1.796<br>4      |
| P12814              | ACTN1          | Alpha-actinin-1                                            | 3                              | 1.992              | 0.049             | EF > 2          |
| P04075              | ALDO<br>A      | Fructose-bisphosphate aldolase A                           | 2                              | 1.111              | 0.850             | EF > 2          |
| P15144              | AMPN           | Aminopeptidase N                                           | 1                              | 0.779              | 0.861             | EF > 2          |
| P01008              | ANT3           | Antithrombin-III                                           | 2                              |                    |                   |                 |
| P27695              | APEX1          | DNA-(apurinic or apyrimidinic site) lyase                  | 1                              | 1.995              |                   |                 |
| Q15582              | BGH3           | Transforming growth factor-beta-induced protein ig-h3      | 5                              | 0.686              | 0.109             | 1.645<br>8      |
| P00736              | C1R            | Complement C1r subcomponent                                | 7                              | 0.666              | 0.072             | 1.574<br>3      |
| P09871              | C1S            | Complement C1s subcomponent                                | 5                              | 0.939              | 0.824             | 1.886<br>5      |
| P40121              | CAPG           | Macrophage-capping protein                                 | 3                              | 0.684              | 0.411             | EF > 2          |
| P07858              | CATB           | Cathepsin B                                                | 7                              | 0.660              | 0.041             | 1.542<br>6      |
| P07339              | CATD           | Cathepsin D                                                | 1                              | 0.950              | 0.990             | EF > 2          |
| P07711              | CATL1          | Cathepsin L1                                               | 3                              | 0.698              | 0.220             | EF > 2          |
| P16070              | CD44           | CD44 antigen                                               | 1                              | 1.174              |                   |                 |
| P00751              | CFAB           | Complement factor B                                        | 7                              | 0.695              | 0.067             | 1.486           |
| P08603              | CFAH           | Complement factor H                                        | 1                              | 0.933              |                   |                 |
| P36222              | CH3L1          | Chitinase-3-like protein 1                                 | 46                             | 0.481              | 0.000             | 1.32            |
| P10909              | CLUS           | Clusterin                                                  | 3                              | 0.507              | 0.015             | 1.528           |
| Q8N137              | CNTRB          | Centrobin                                                  | 1                              |                    |                   |                 |
| P08123              | CO1A2          | Collagen alpha-2(I) chain                                  | 10                             | 0.585              | 0.012             | 1.487<br>2      |
| P01024              | CO3            | Complement C3                                              | 1                              | 0.545              | 0.022             | 1.477<br>9      |
| P12109              | CO6A1          | Collagen alpha-1(VI) chain                                 | 4                              | 0.654              | 0.007             | 1.298<br>3      |
| P49747              | COMP           | Cartilage oligomeric matrix protein                        | 4                              | 0.665              | 0.041             | 1.471<br>7      |
| Q14019              | COTL1          | Coactin-like protein                                       | 2                              | 1.558              | 0.141             | EF > 2          |
| O94985              | CSTN1          | Calsynenin-1                                               | 1                              | 0.709              |                   |                 |
| P13639              | EF2            | Elongation factor 2                                        | 2                              | 1.745              | 0.187             | EF > 2          |
| P06733              | ENOA           | Alpha-enolase                                              | 7                              | 1.640              | 0.001             | 1.242<br>9      |
| Q12805              | FBLN3          | EGF-containing fibulin-like extracellular matrix protein 1 | 1                              | 0.414              |                   |                 |
| P02751              | FINC           | Fibronectin                                                | 11                             | 0.552              | 0.552             | EF > 2          |
| Q06828              | FMOD           | Fibromodulin                                               | 2                              | 0.595              | 0.147             | EF > 2          |
| P06744              | G6PI           | Glucose-6-phosphate isomerase                              | 1                              | 1.833              |                   |                 |
| P07093              | GDN            | Glia-derived nexin                                         | 5                              | 0.804              | 0.218             | 1.473<br>1      |
| P28161              | GSTM2          | Glutathione S-transferase Mu 2                             | 1                              |                    |                   |                 |
| P09211              | GSTP1          | Glutathione S-transferase P                                | 3                              | 1.248              | 0.678             | EF > 2          |
| P02042              | HBD            | Hemoglobin subunit delta                                   | 1                              | 0.010              |                   |                 |
| P11142              | HSP7C          | Heat shock cognate 71 kDa protein                          | 1                              | 2.408              | 0.076             | EF > 2          |

|        |       |                                                                   |    |            |       |            |
|--------|-------|-------------------------------------------------------------------|----|------------|-------|------------|
| P04792 | HSPB1 | Heat shock protein beta-1                                         | 2  | 1.586      | 0.505 | EF > 2     |
| P17936 | IBP3  | Insulin-like growth factor-binding protein 3                      | 1  | 0.489      | 0.437 | EF > 2     |
| P22692 | IBP4  | Insulin-like growth factor-binding protein 4                      | 2  |            |       |            |
| P24592 | IBP6  | Insulin-like growth factor-binding protein 6                      | 1  | 0.684      | 0.185 | EF > 2     |
| Q16270 | IBP7  | Insulin-like growth factor-binding protein 7                      | 2  | 1.291      | 0.235 | EF > 2     |
| P05155 | IC1   | Plasma protease C1 inhibitor                                      | 1  | 0.710      |       |            |
| P0DOX7 | IGK   | Immunoglobulin kappa light chain                                  | 1  |            |       |            |
| P05231 | IL6   | Interleukin-6                                                     | 3  | 1.221      | 0.423 | 1.987<br>5 |
| P13645 | K1C10 | Keratin, type I cytoskeletal 10                                   | 3  |            |       |            |
| P35527 | K1C9  | Keratin, type I cytoskeletal 9                                    | 2  |            |       |            |
| P04264 | K2C1  | Keratin, type II cytoskeletal 1                                   | 11 | 76.42<br>7 |       |            |
| P14618 | KPYM  | Pyruvate kinase PKM                                               | 5  | 1.389      | 0.158 | 1.646<br>5 |
| P00338 | LDHA  | L-lactate dehydrogenase A chain                                   | 2  | 2.175      | 0.351 | EF > 2     |
| P17931 | LEG3  | Galectin-3                                                        | 1  | 1.097      | 0.981 | EF > 2     |
| P51884 | LUM   | Lumican                                                           | 10 | 0.536      | 0.008 | 1.511<br>3 |
| P40925 | MDHC  | Malate dehydrogenase, cytoplasmic                                 | 1  | 3.158      |       |            |
| P03956 | MMP1  | Interstitial collagenase                                          | 17 | 0.967      | 0.888 | 1.671<br>8 |
| P08253 | MMP2  | 72 kDa type IV collagenase                                        | 10 | 0.672      | 0.031 | 1.419      |
| P08254 | MMP3  | Stromelysin-1                                                     | 7  | 1.386      | 0.725 | EF > 2     |
| P26038 | MOES  | Moesin                                                            | 5  | 1.419      | 0.695 | EF > 2     |
| Q96TA1 | NIBL1 | Niban-like protein 1                                              | 1  | 1.167      |       |            |
| P05121 | PAI1  | Plasminogen activator inhibitor 1                                 | 1  | 0.620      | 0.143 | EF > 2     |
| Q15113 | PCOC1 | Procollagen C-endopeptidase enhancer 1                            | 1  | 0.556      |       |            |
| P30101 | PDIA3 | Protein disulfide-isomerase A3                                    | 2  | 1.243      | 0.489 | EF > 2     |
| P18669 | PGAM1 | Phosphoglycerate mutase 1                                         | 2  | 1.324      | 0.340 | EF > 2     |
| P00558 | PGK1  | Phosphoglycerate kinase 1                                         | 1  | 1.083      | 0.834 | EF > 2     |
| P07585 | PGS2  | Decorin                                                           | 14 | 0.582      | 0.008 | 1.454<br>3 |
| P62937 | PPIA  | Peptidyl-prolyl cis-trans isomerase A                             | 2  | 2.017      | 0.090 | EF > 2     |
| P23284 | PPIB  | Peptidyl-prolyl cis-trans isomerase B                             | 1  | 1.653      | 0.377 | EF > 2     |
| Q06830 | PRDX1 | Peroxiredoxin-1                                                   | 2  | 1.948      | 0.020 | 1.505<br>8 |
| P30041 | PRDX6 | Peroxiredoxin-6                                                   | 1  | 76.42<br>7 |       |            |
| P07737 | PROF1 | Profilin-1                                                        | 1  | 1.033      | 0.969 | EF > 2     |
| P49721 | PSB2  | Proteasome subunit beta type-2                                    | 1  | 2.914      |       |            |
| Q9UL46 | PSME2 | Proteasome activator complex subunit 2                            | 2  | 1.799      | 0.196 | EF > 2     |
| P26022 | PTX3  | Pentraxin-related protein 3                                       | 5  | 0.451      | 0.021 | 1.827<br>5 |
| O00391 | QSOX1 | Sulfhydryl oxidase 1                                              | 6  | 0.610      | 0.003 | 1.302<br>3 |
| P55017 | S12A3 | Solute carrier family 12 member 3                                 | 1  |            |       |            |
| P50454 | SERPH | Serpin H1                                                         | 1  | 1.368      | 0.379 | EF > 2     |
| P04179 | SODM  | Superoxide dismutase [Mn], mitochondrial                          | 1  | 2.812      |       |            |
| P09486 | SPRC  | SPARC                                                             | 3  | 0.526      | 0.031 | 1.644<br>1 |
| P42224 | STAT1 | Signal transducer and activator of transcription 1-<br>alpha/beta | 2  |            |       |            |
| P23381 | SYWC  | Tryptophan--tRNA ligase, cytoplasmic                              | 1  | 0.667      | 0.153 | EF > 2     |

|        |       |                                             |    |       |       |            |
|--------|-------|---------------------------------------------|----|-------|-------|------------|
| P68363 | TBA1B | Tubulin alpha-1B chain                      | 7  | 1.907 | 0.005 | EF > 2     |
| P07437 | TBB5  | Tubulin beta chain                          | 5  | 2.630 | 0.012 | 1.909<br>8 |
| P01033 | TIMP1 | Metalloproteinase inhibitor 1               | 1  | 0.566 | 0.270 | EF > 2     |
| P16035 | TIMP2 | Metalloproteinase inhibitor 2               | 1  | 0.608 |       |            |
| P29401 | TKT   | Transketolase                               | 4  | 1.511 | 0.170 | EF > 2     |
| P60174 | TPIS  | Triphosphate isomerase                      | 2  | 0.806 | 0.530 | EF > 2     |
| P02788 | TRFL  | Lactotransferrin                            | 1  |       |       |            |
| P19971 | TYPH  | Thymidine phosphorylase                     | 1  | 0.909 |       |            |
| P22314 | UBA1  | Ubiquitin-like modifier-activating enzyme 1 | 1  | 1.076 | 0.601 | EF > 2     |
| Q6EMK4 | VASN  | Vasorin                                     | 1  | 0.429 | 0.077 | EF > 2     |
| P08670 | VIME  | Vimentin                                    | 16 | 1.758 | 0.402 | EF > 2     |
| P02774 | VTDB  | Vitamin D-binding protein                   | 1  |       |       |            |
| P04004 | VTNC  | Vitronectin                                 | 1  |       |       |            |
| Q5GH72 | XKR7  | XK-related protein 7                        | 1  |       |       |            |

## Reverse

| Acc No <sup>a</sup> | Protein<br>Symbol | Protein Name                                          | Peptides<br>(95%) <sup>b</sup> | Ratio <sup>c</sup> | PVal <sup>d</sup> | EF <sup>e</sup> |
|---------------------|-------------------|-------------------------------------------------------|--------------------------------|--------------------|-------------------|-----------------|
| P01023              | A2MG              | Alpha-2-macroglobulin                                 | 2                              |                    |                   |                 |
| P63261              | ACTG              | Actin, cytoplasmic 2                                  | 8                              | 1.022              | 0.780             | 1.194           |
| P12814              | ACTN1             | Alpha-actinin-1                                       | 4                              | 1.462              | 0.143             | 1.842<br>4      |
| P02768              | ALBU              | Serum albumin                                         | 25                             |                    |                   |                 |
| P04075              | ALDOA             | Fructose-bisphosphate aldolase A                      | 1                              | 1.250              |                   |                 |
| P15144              | AMPN              | Aminopeptidase N                                      | 1                              | 0.589              |                   |                 |
| P27695              | APEX1             | DNA-(apurinic or apyrimidinic site) lyase             | 1                              | 1.084              |                   |                 |
| Q9PIU1              | ARP3B             | Actin-related protein 3B                              | 1                              | 1.202              |                   |                 |
| P61769              | B2MG              | Beta-2-microglobulin                                  | 1                              | 0.823              |                   |                 |
| Q15582              | BGH3              | Transforming growth factor-beta-induced protein ig-h3 | 7                              | 0.410              | 0.000             | 1.329<br>5      |
| P00736              | C1R               | Complement C1r subcomponent                           | 8                              | 0.649              | 0.007             | 1.331<br>7      |
| P09871              | C1S               | Complement C1s subcomponent                           | 9                              | 0.531              | 0.040             | 1.815<br>4      |
| P40121              | CAPG              | Macrophage-capping protein                            | 2                              | 1.816              | 0.120             | EF > 2          |
| P07858              | CATB              | Cathepsin B                                           | 8                              | 0.516              | 0.000             | 1.171<br>2      |
| P07339              | CATD              | Cathepsin D                                           | 1                              | 0.615              | 0.183             | EF > 2          |
| P07711              | CATL1             | Cathepsin L1                                          | 4                              | 0.692              | 0.079             | 1.606<br>7      |
| P16070              | CD44              | CD44 antigen                                          | 1                              | 0.604              |                   |                 |
| P00751              | CFAB              | Complement factor B                                   | 10                             | 0.591              | 0.191             | EF > 2          |
| P08603              | CFAH              | Complement factor H                                   | 1                              | 1.419              |                   |                 |
| P36222              | CH3L1             | Chitinase-3-like protein 1                            | 60                             | 0.559              | 0.002             | 1.419<br>7      |

|            |           |                                                            |    |       |       |            |
|------------|-----------|------------------------------------------------------------|----|-------|-------|------------|
| P10909     | CLUS      | Clusterin                                                  | 5  | 0.880 | 0.907 | EF ><br>2  |
| P08123     | CO1A2     | Collagen alpha-2(I) chain                                  | 10 | 1.000 | 1.000 | 1.651<br>2 |
| P01024     | CO3       | Complement C3                                              | 1  | 0.346 | 0.064 | EF ><br>2  |
| P12109     | CO6A1     | Collagen alpha-1(VI) chain                                 | 3  | 0.886 | 0.465 | 1.429<br>6 |
| P12111     | CO6A3     | Collagen alpha-3(VI) chain                                 | 2  | 0.593 | 0.016 | 1.471      |
| Q99715     | COCA<br>1 | Collagen alpha-1(XII) chain                                | 1  | 0.623 |       |            |
| P49747     | COMP      | Cartilage oligomeric matrix protein                        | 9  | 1.222 | 0.508 | 1.662<br>2 |
| Q14019     | COTL1     | Coactin-like protein                                       | 2  | 1.314 | 0.253 | EF ><br>2  |
| P02511     | CRYA<br>B | Alpha-crystallin B chain                                   | 1  | 3.606 |       |            |
| O94985     | CSTN1     | Calsyntenin-1                                              | 1  | 0.839 |       |            |
| P13639     | EF2       | Elongation factor 2                                        | 1  | 1.514 | 0.181 | EF ><br>2  |
| P06733     | ENOA      | Alpha-enolase                                              | 5  | 1.133 | 0.589 | 1.709<br>1 |
| Q12805     | FBLN3     | EGF-containing fibulin-like extracellular matrix protein 1 | 1  | 0.373 |       |            |
| P02751     | FINC      | Fibronectin                                                | 12 | 0.568 | 0.013 | 1.513<br>7 |
| Q06828     | FMOD      | Fibromodulin                                               | 2  | 0.818 | 0.631 | EF ><br>2  |
| P04406     | G3P       | Glyceraldehyde-3-phosphate dehydrogenase                   | 1  | 1.292 | 0.235 | EF ><br>2  |
| P06744     | G6PI      | Glucose-6-phosphate isomerase                              | 1  | 1.369 |       |            |
| P50395     | GDIB      | Rab GDP dissociation inhibitor beta                        | 1  | 1.459 | 0.829 | EF ><br>2  |
| P07093     | GDN       | Glia-derived nexin                                         | 9  | 0.431 | 0.005 | 1.650<br>8 |
| P09211     | GSTP1     | Glutathione S-transferase P                                | 2  | 1.880 | 0.099 | EF ><br>2  |
| P57053     | H2BFS     | Histone H2B type F-S                                       | 1  | 2.068 |       |            |
| P02042     | HBD       | Hemoglobin subunit delta                                   | 1  |       |       |            |
| P04792     | HSPB1     | Heat shock protein beta-1                                  | 1  | 1.729 | 0.221 | EF ><br>2  |
| P17936     | IBP3      | Insulin-like growth factor-binding protein 3               | 2  | 1.003 | 0.995 | EF ><br>2  |
| P22692     | IBP4      | Insulin-like growth factor-binding protein 4               | 2  | 1.057 | 0.704 | EF ><br>2  |
| P24592     | IBP6      | Insulin-like growth factor-binding protein 6               | 1  | 0.576 |       |            |
| Q16270     | IBP7      | Insulin-like growth factor-binding protein 7               | 2  | 0.787 | 0.249 | EF ><br>2  |
| P0DOX<br>7 | IGK       | Immunoglobulin kappa light chain                           | 1  |       |       |            |
| P05231     | IL6       | Interleukin-6                                              | 4  | 0.424 | 0.032 | EF ><br>2  |
| P13645     | K1C10     | Keratin, type I cytoskeletal 10                            | 2  |       |       |            |
| P35527     | K1C9      | Keratin, type I cytoskeletal 9                             | 2  |       |       |            |
| P35908     | K22E      | Keratin, type II cytoskeletal 2 epidermal                  | 3  | 0.010 |       |            |
| P04264     | K2C1      | Keratin, type II cytoskeletal 1                            | 10 | 0.010 |       |            |

|        |           |                                                      |    |       |       |            |
|--------|-----------|------------------------------------------------------|----|-------|-------|------------|
| P14618 | KPYM      | Pyruvate kinase PKM                                  | 4  | 1.204 | 0.522 | 1.996<br>6 |
| P00338 | LDHA      | L-lactate dehydrogenase A chain                      | 3  | 1.515 | 0.466 | EF ><br>2  |
| P51884 | LUM       | Lumican                                              | 16 | 0.632 | 0.253 | EF ><br>2  |
| P33908 | MA1A<br>1 | Mannyl-oligaccharide 1,2-alpha-mannidase IA          | 1  | 0.589 |       |            |
| P14174 | MIF       | Macrophage migration inhibitory factor               | 2  | 0.775 |       |            |
| P03956 | MMP1      | Interstitial collagenase                             | 18 | 0.322 | 0.014 | EF ><br>2  |
| P08253 | MMP2      | 72 kDa type IV collagenase                           | 10 | 0.541 | 0.003 | 1.400<br>1 |
| P08254 | MMP3      | Stromelysin-1                                        | 10 | 0.414 | 0.082 | EF ><br>2  |
| P26038 | MOES      | Moesin                                               | 5  | 1.344 | 0.206 | 1.686<br>5 |
| P22392 | NDKB      | Nucleide diphphate kinase B                          | 2  | 1.949 | 0.135 | EF ><br>2  |
| Q96TA1 | NIBL1     | Niban-like protein 1                                 | 1  | 2.583 |       |            |
| P05121 | PAI1      | Plasminogen activator inhibitor 1                    | 1  | 0.542 | 0.105 | EF ><br>2  |
| Q15113 | PCOC1     | Procollagen C-endopeptidase enhancer 1               | 1  | 0.366 |       |            |
| P30101 | PDIA3     | Protein disulfide-isomerase A3                       | 4  | 2.090 | 0.003 | 1.352<br>6 |
| Q15084 | PDIA6     | Protein disulfide-isomerase A6                       | 1  |       |       |            |
| P18669 | PGAM<br>1 | Phosphoglycerate mutase 1                            | 2  | 1.994 | 0.112 | EF ><br>2  |
| P21810 | PGS1      | Biglycan                                             | 1  | 0.554 | 0.106 | EF ><br>2  |
| P07585 | PGS2      | Decorin                                              | 13 | 0.540 | 0.022 | 1.665      |
| O60664 | PLIN3     | Perilipin-3                                          | 1  | 2.891 |       |            |
| P62937 | PPIA      | Peptidyl-prolyl cis-trans isomerase A                | 2  | 1.573 | 0.145 | EF ><br>2  |
| P23284 | PPIB      | Peptidyl-prolyl cis-trans isomerase B                | 1  | 1.110 | 0.852 | EF ><br>2  |
| Q06830 | PRDX1     | Peroxiredoxin-1                                      | 1  | 1.725 | 0.393 | EF ><br>2  |
| P30041 | PRDX6     | Peroxiredoxin-6                                      | 1  | 1.014 |       |            |
| Q92954 | PRG4      | Proteoglycan 4                                       | 2  | 0.831 | 0.737 | EF ><br>2  |
| P49721 | PSB2      | Proteasome subunit beta type-2                       | 1  | 1.289 |       |            |
| Q9UL46 | PSME2     | Proteasome activator complex subunit 2               | 2  | 2.023 | 0.296 | EF ><br>2  |
| P26022 | PTX3      | Pentraxin-related protein 3                          | 5  | 0.628 | 0.069 | 1.783<br>1 |
| O00391 | QSOX1     | Sulfhydryl oxidase 1                                 | 6  | 0.474 | 0.001 | 1.415<br>6 |
| P50454 | SERPH     | Serpin H1                                            | 2  | 1.497 | 0.161 | EF ><br>2  |
| Q9H299 | SH3L3     | SH3 domain-binding glutamic acid-rich-like protein 3 | 1  | 2.518 |       |            |
| P04179 | SODM      | Superoxide dismutase [Mn], mitochondrial             | 2  | 0.853 |       |            |
| P09486 | SPRC      | SPARC                                                | 5  | 0.551 | 0.239 | EF ><br>2  |
| P23381 | SYWC      | Tryptophan--tRNA ligase, cytoplasmic                 | 1  | 0.914 |       |            |

|            |           |                                             |    |       |       |            |
|------------|-----------|---------------------------------------------|----|-------|-------|------------|
| P68363     | TBA1B     | Tubulin alpha-1B chain                      | 8  | 1.511 | 0.017 | 1.379<br>9 |
| Q13509     | TBB3      | Tubulin beta-3 chain                        | 4  | 1.841 | 0.532 | EF ><br>2  |
| P07437     | TBB5      | Tubulin beta chain                          | 4  | 1.598 | 0.717 | EF ><br>2  |
| P24821     | TENA      | Tenascin                                    | 1  | 0.635 | 0.274 | EF ><br>2  |
| P01033     | TIMP1     | Metalloproteinase inhibitor 1               | 4  | 0.654 | 0.023 | 1.403      |
| P16035     | TIMP2     | Metalloproteinase inhibitor 2               | 1  | 0.753 | 0.214 | EF ><br>2  |
| P29401     | TKT       | Transketolase                               | 3  | 1.398 | 0.050 | 1.553<br>7 |
| P60174     | TPIS      | Triphosphate isomerase                      | 3  | 1.600 | 0.195 | EF ><br>2  |
| P02787     | TRFE      | Serotransferrin                             | 2  | 0.010 |       |            |
| Q8NBS<br>9 | TXND<br>5 | Thioredoxin domain-containing protein 5     | 2  | 1.343 | 0.210 | EF ><br>2  |
| P19971     | TYPH      | Thymidine phosphorylase                     | 1  | 1.039 |       |            |
| P22314     | UBA1      | Ubiquitin-like modifier-activating enzyme 1 | 1  | 2.945 |       |            |
| O60701     | UGDH      | UDP-glucose 6-dehydrogenase                 | 1  | 5.006 | 0.145 | EF ><br>2  |
| Q6EMK<br>4 | VASN      | Vasorin                                     | 1  | 0.717 | 0.335 | EF ><br>2  |
| P08670     | VIME      | Vimentin                                    | 11 | 1.230 | 0.275 | 1.48       |
| P18206     | VINC      | Vinculin                                    | 2  | 1.776 |       |            |
| P04004     | VTNC      | Vitronectin                                 | 1  |       |       |            |

<sup>a</sup>Protein accession number according to the SwissProt and TrEMBL databases. <sup>b</sup>Number of unique peptides (Pept) used for protein identification at 95% confidence. <sup>c</sup>SILAC ratios that represent the relative protein abundance in Fn-fs+VIP versus Fn-fs treated SF-AC co-cultures at the same time point (48 h) (n = 4). <sup>d</sup>p-value of the corresponding SILAC ratios. <sup>e</sup>Error factor calculated by Protein Pilot 4.0 software for quantification accuracy. SILAC, stable isotope labelling by amino acids in cell culture; OA SF-AC, osteoarthritic synovial fibroblasts-articular chondrocytes.



**Table S2.** Proteins identified by SILAC analysis in the secretome of OA Fn-fs-stimulated SF-AC co-cultures and normal IL-1 $\beta$ -stimulated AC.

| Acc No <sup>a</sup> | Protein Symbol | Protein name                                          | Fn-fs stimulated SF-AC <sup>b</sup> | IL-1 $\beta$ stimulated AC <sup>c</sup> |
|---------------------|----------------|-------------------------------------------------------|-------------------------------------|-----------------------------------------|
| P01009              | A1AT           | Alpha-1-antitrypsin                                   |                                     | x                                       |
| P01023              | A2MG           | Alpha-2-macroglobulin                                 | x                                   |                                         |
| P63261              | ACTG           | Actin, cytoplasmic 2                                  | x                                   |                                         |
| P12814              | ACTN1          | Alpha-actinin-1                                       | x                                   |                                         |
| P04075              | ALDOA          | Fructose-bisphosphate aldolase A                      | x                                   |                                         |
| P15144              | AMPN           | Aminopeptidase N                                      | x                                   |                                         |
| P01008              | ANT3           | Antithrombin-III                                      | x                                   |                                         |
| P07355              | ANXA2          | Annexin A2                                            |                                     | x                                       |
| P27695              | APEX1          | DNA-(apurinic or apyrimidinic site) lyase             | x                                   |                                         |
| Q9P1U1              | ARP3B          | Actin-related protein 3B                              | x                                   |                                         |
| P61769              | B2MG           | Beta-2-microglobulin                                  | x                                   | x                                       |
| Q15582              | BGH3           | Transforming growth factor-beta-induced protein ig-h3 | x                                   | x                                       |
| P00736              | C1R            | Complement C1r subcomponent                           | x                                   | x                                       |
| P09871              | C1S            | Complement C1s subcomponent                           | x                                   | x                                       |
| P40121              | CAPG           | Macrophage-capping protein                            | x                                   |                                         |
| P07858              | CATB           | Cathepsin B                                           | x                                   | x                                       |
| P07339              | CATD           | Cathepsin D                                           | x                                   |                                         |
| P07711              | CATL1          | Cathepsin L1                                          | x                                   |                                         |
| Q76M96              | CCD80          | Coiled-coil domain-containing protein 80              |                                     | x                                       |
| P13500              | CCL2           | C-C motif chemokine 2b                                |                                     | x                                       |
| P80075              | CCL8           | C-C motif chemokine 8b                                |                                     | x                                       |
| P16070              | CD44           | CD44 antigen                                          | x                                   |                                         |
| P00751              | CFAB           | Complement factor B                                   | x                                   | x                                       |
| P08603              | CFAH           | Complement factor H                                   | x                                   |                                         |
| P36222              | CH3L1          | Chitinase-3-like protein 1                            | x                                   | x                                       |
| Q15782              | CH3L2          | Chitinase-3-like protein 2b                           |                                     | x                                       |
| P10909              | CLUS           | Clusterin                                             | x                                   | x                                       |
| Q8N137              | CNTRB          | Centrobilin                                           | x                                   |                                         |
| P08123              | CO1A2          | Collagen alpha-2(I) chain                             | x                                   | x                                       |
| P01024              | CO3            | Complement C3                                         | x                                   | x                                       |
| P02461              | CO3A1          | Collagen alpha-1(III) chain                           |                                     | x                                       |
| P12109              | CO6A1          | Collagen alpha-1(VI) chain                            | x                                   | x                                       |
| P12111              | CO6A3          | Collagen alpha-3(VI) chain                            | x                                   |                                         |
| Q99715              | COCA1          | Collagen alpha-1(XII) chain                           | x                                   | x                                       |
| P49747              | COMP           | Cartilage oligomeric matrix protein                   | x                                   |                                         |
| Q14019              | COTL1          | Coactin-like protein                                  | x                                   |                                         |
| P02511              | CRYAB          | Alpha-crystallin B chain                              | x                                   |                                         |
| P09603              | CSF1           | Macrophage colony-stimulating factor 1b               |                                     | x                                       |
| O94985              | CSTN1          | Calsynenin-1                                          | x                                   |                                         |
| P19876              | CXCL3          | C-X-C motif chemokine 3b                              |                                     | x                                       |
| P42830              | CXCL5          | C-X-C motif chemokine 5b                              |                                     | x                                       |
| P80162              | CXCL6          | C-X-C motif chemokine 6b                              |                                     | x                                       |
| P01034              | CYTC           | Cystatin-C                                            |                                     | x                                       |

|        |       |                                                            |   |   |
|--------|-------|------------------------------------------------------------|---|---|
| P15924 | DESP  | Desmoplakinb                                               |   | x |
| P13639 | EF2   | Elongation factor 2                                        | x |   |
| P06733 | ENOA  | Alpha-enolase                                              | x |   |
| P23142 | FBLN1 | Fibulin-1                                                  |   | x |
| Q12805 | FBLN3 | EGF-containing fibulin-like extracellular matrix protein 1 | x | x |
| P02751 | FINC  | Fibronectin                                                | x | x |
| Q06828 | FMOD  | Fibromodulin                                               | x |   |
| Q12841 | FSTL1 | Follistatin-related protein 1                              |   | x |
| P04406 | G3P   | Glyceraldehyde-3-phosphate dehydrogenase                   | x |   |
| P06744 | G6PI  | Glucose-6-phosphate isomerase                              | x |   |
| P50395 | GDIB  | Rab GDP dissociation inhibitor beta                        | x |   |
| P07093 | GDN   | Glia-derived nexin                                         | x | x |
| P09341 | GROA  | Growth-regulated alpha protein                             |   | x |
| P28161 | GSTM2 | Glutathione S-transferase Mu 2                             | x |   |
| P09211 | GSTP1 | Glutathione S-transferase P                                | x |   |
| P57053 | H2BFS | Histone H2B type F-S                                       | x |   |
| P02042 | HBD   | Hemoglobin subunit delta                                   | x |   |
| P11142 | HSP7C | Heat shock cognate 71 kDa protein                          | x |   |
| P04792 | HSPB1 | Heat shock protein beta-1                                  | x |   |
| P17936 | IBP3  | Insulin-like growth factor-binding protein 3               | x | x |
| P22692 | IBP4  | Insulin-like growth factor-binding protein 4               | x | x |
| P24593 | IBP5  | Insulin-like growth factor-binding protein 5               |   | x |
| P24592 | IBP6  | Insulin-like growth factor-binding protein 6               | x | x |
| Q16270 | IBP7  | Insulin-like growth factor-binding protein 7               | x | x |
| P05155 | IC1   | Plasma protease C1 inhibitor                               | x | x |
| P0DOX7 | IGK   | Immunoglobulin kappa light chain                           | x |   |
| P05231 | IL6   | Interleukin-6                                              | x | x |
| P10145 | IL8   | Interleukin-8                                              |   | x |
| P13645 | K1C10 | Keratin, type I cytoskeletal 10                            | x | x |
| P02533 | K1C14 | Keratin, type I cytoskeletal 14b                           |   | x |
| P08779 | K1C16 | Keratin, type I cytoskeletal 16b                           |   | x |
| P35527 | K1C9  | Keratin, type I cytoskeletal 9                             | x | x |
| P04264 | K2C1  | Keratin, type II cytoskeletal 1                            | x | x |
| P04259 | K2C6B | Keratin, type II cytoskeletal 6Bb                          |   | x |
| P14618 | KPYM  | Pyruvate kinase PKM                                        | x |   |
| P00338 | LDHA  | L-lactate dehydrogenase A chain                            | x |   |
| P17931 | LEG3  | Galectin-3                                                 | x |   |
| P51884 | LUM   | Lumican                                                    | x | x |
| P33908 | MA1A1 | Mannyl-oligaccharide 1,2-alpha-mannidase IA                | x |   |
| P40925 | MDHC  | Malate dehydrogenase, cytoplasmic                          | x |   |
| Q08431 | MFGM  | Lactadherin                                                |   | x |
| P14174 | MIF   | Macrophage migration inhibitory factor                     | x |   |
| P03956 | MMP1  | Interstitial collagenase                                   | x | x |
| P08253 | MMP2  | 72 kDa type IV collagenase                                 | x | x |
| P08254 | MMP3  | Stromelysin-1                                              | x | x |
| P26038 | MOES  | Moesin                                                     | x |   |

|        |       |                                                               |   |   |
|--------|-------|---------------------------------------------------------------|---|---|
| P22392 | NDKB  | Nucleide diphphate kinase B                                   | x |   |
| Q96TA1 | NIBL1 | Niban-like protein 1                                          | x |   |
| Q8N130 | NPT2C | Sodium-dependent phosphate transport protein 2Cb              |   | x |
| P05121 | PAI1  | Plasminogen activator inhibitor 1                             | x |   |
| Q15113 | PCOC1 | Procollagen C-endopeptidase enhancer 1                        | x | x |
| P30101 | PDIA3 | Protein disulfide-isomerase A3                                | x |   |
| Q15084 | PDIA6 | Protein disulfide-isomerase A6                                | x |   |
| P18669 | PGAM1 | Phosphoglycerate mutase 1                                     | x |   |
| P00558 | PGK1  | Phosphoglycerate kinase 1                                     | x |   |
| P21810 | PGS1  | Biglycan                                                      | x | x |
| P07585 | PGS2  | Decorin                                                       | x | x |
| O60664 | PLIN3 | Perilipin-3                                                   | x |   |
| P55058 | PLTP  | Phospholipid transfer protein                                 |   | x |
| A5A3E0 | POTEF | POTE ankyrin domain family member Fb                          |   | x |
| P62937 | PPIA  | Peptidyl-prolyl cis-trans isomerase A                         | x |   |
| P23284 | PPIB  | Peptidyl-prolyl cis-trans isomerase B                         | x |   |
| Q06830 | PRDX1 | Peroxiredoxin-1                                               | x |   |
| P30041 | PRDX6 | Peroxiredoxin-6                                               | x |   |
| Q92954 | PRG4  | Proteoglycan 4                                                | x | x |
| P07737 | PROF1 | Profilin-1                                                    | x |   |
| P49721 | PSB2  | Proteasome subunit beta type-2                                | x |   |
| Q9UL46 | PSME2 | Proteasome activator complex subunit 2                        | x |   |
| P26022 | PTX3  | Pentraxin-related protein 3                                   | x | x |
| O00391 | QSOX1 | Sulfhydryl oxidase 1                                          | x | x |
| P05109 | S10A8 | Protein S100-A8b                                              |   | x |
| P06702 | S10A9 | Protein S100-A9b                                              |   | x |
| P55017 | S12A3 | Solute carrier family 12 member 3                             | x |   |
| P07602 | SAP   | Proactivator polypeptideb                                     |   | x |
| P31431 | SDC4  | Syndecan-4                                                    |   | x |
| P50454 | SERPH | Serpin H1                                                     | x |   |
| Q9H299 | SH3L3 | SH3 domain-binding glutamic acid-rich-like protein 3          | x |   |
| P04179 | SODM  | Superoxide dismutase [Mn], mitochondrial                      | x |   |
| P09486 | SPRC  | SPARC                                                         | x | x |
| P42224 | STAT1 | Signal transducer and activator of transcription 1-alpha/beta | x |   |
| P23381 | SYWC  | Tryptophan--tRNA ligase, cytoplasmic                          | x |   |
| Q7Z7G0 | TARSH | Target of Nesh-SH3                                            |   | x |
| P68363 | TBA1B | Tubulin alpha-1B chain                                        | x |   |
| Q13509 | TBB3  | Tubulin beta-3 chain                                          | x |   |
| P07437 | TBB5  | Tubulin beta chain                                            | x |   |
| P24821 | TENA  | Tenascin                                                      | x | x |
| P05452 | TETN  | Tetranectin                                                   |   | x |
| P01033 | TIMP1 | Metalloproteinase inhibitor 1                                 | x | x |
| P16035 | TIMP2 | Metalloproteinase inhibitor 2                                 | x | x |
| P29401 | TKT   | Transketolase                                                 | x |   |

|            |       |                                             |   |   |
|------------|-------|---------------------------------------------|---|---|
| P60174     | TPIS  | Triphosphate isomerase                      | x |   |
| P02787     | TRFE  | Serotransferrin                             | x |   |
| P02788     | TRFL  | Lactotransferrin                            | x |   |
| Q8NH<br>M4 | TRY6  | Putative trypsin-6b                         |   | x |
| P98066     | TSG6  | TNF-inducible gene 6 protein                |   | x |
| P07996     | TSP1  | Thrombospondin-1                            |   | x |
| Q8NBS<br>9 | TXND5 | Thioredoxin domain-containing protein 5     | x |   |
| P19971     | TYPH  | Thymidine phosphorylase                     | x |   |
| P22314     | UBA1  | Ubiquitin-like modifier-activating enzyme 1 | x |   |
| O60701     | UGDH  | UDP-glucose 6-dehydrogenase                 | x |   |
| Q6EMK<br>4 | VASN  | Vasorin                                     | x | x |
| P19320     | VCAM1 | Vascular cell adhesion protein 1            |   | x |
| P08670     | VIME  | Vimentin                                    | x |   |
| P18206     | VINC  | Vinculin                                    | x |   |
| P02774     | VTDB  | Vitamin D-binding protein                   | x |   |
| P04004     | VTNC  | Vitronectin                                 | x |   |
| Q5GH7<br>2 | XKR7  | XK-related protein 7                        | x |   |

<sup>a</sup>Protein accession number according to the SwissProt and TrEMBL databases. <sup>b</sup>Proteins identified by SILAC analysis in the present study. <sup>c</sup>Proteins identified by SILAC analysis in the previous study [32]. SILAC, stable isotope labelling by amino acids in cell culture; OA, osteoarthritis; Fn-fs, fibronectin fragments; SF, synovial fibroblasts; AC, articular chondrocytes; IL-1 $\beta$ , interleukin-1 $\beta$ .
